# Supplementary material
Source: PubMed Central journal article supplement (PMC7460960)
Supplement: JGS-68-2440-s001.pdf [file JGS-68-2440-s001.pdf]

## Delirium and adverse outcomes in hospitalized patients with COVID-19.

1  
2  
3

4 **Supplementary Table S1:** Complete baseline characteristics of hospitalized middle-aged and older  
5 adults with COVID-19, according to the overall occurrence of delirium.

|                           | Total<br>N=707 | No delirium<br>N=473 | Delirium<br>N=234 | P-value |
|---------------------------|----------------|----------------------|-------------------|---------|
| Age (years)               |                |                      |                   | <0.001  |
| 50-64                     | 339 (48)       | 258 (55)             | 81 (35)           |         |
| 65-79                     | 274 (39)       | 176 (37)             | 98 (42)           |         |
| ≥80                       | 94 (13)        | 39 (8)               | 55 (24)           |         |
| Age (years)               | 66 (±11)       | 64 (±10)             | 70 (±1)           | <0.001  |
| Female sex                | 303 (43)       | 212 (45)             | 91 (39)           | 0.13    |
| Race or ethnicity         |                |                      |                   | 0.65    |
| White                     | 451 (64)       | 304 (64)             | 147 (63)          |         |
| Mixed                     | 168 (24)       | 107 (23)             | 61 (26)           |         |
| Black                     | 75 (11)        | 54 (11)              | 21 (9)            |         |
| Other                     | 13 (2)         | 8 (2)                | 5 (2)             |         |
| Marital status            |                |                      |                   | 0.012   |
| Unmarried                 | 256 (36)       | 185 (39)             | 71 (30)           |         |
| Married                   | 302 (43)       | 203 (43)             | 99 (42)           |         |
| Divorced                  | 63 (9)         | 39 (8)               | 24 (10)           |         |
| Widowed                   | 86 (12)        | 46 (10)              | 40 (17)           |         |
| Literacy (years)          |                |                      |                   | 0.21    |
| ≥9                        | 196 (28)       | 137 (29)             | 59 (25)           |         |
| 5-8                       | 215 (30)       | 149 (32)             | 66 (28)           |         |
| ≤4                        | 296 (42)       | 187 (40)             | 109 (47)          |         |
| Dementia                  | 30 (4)         | 8 (2)                | 22 (9)            | <0.001  |
| Diabetes                  | 299 (42)       | 201 (42)             | 98 (42)           | 0.88    |
| Cerebrovascular disease   | 52 (7)         | 23 (5)               | 29 (12)           | <0.001  |
| Coronary disease          | 98 (14)        | 69 (15)              | 29 (12)           | 0.43    |
| Hypertension              | 483 (68)       | 322 (68)             | 161 (69)          | 0.67    |
| Heart failure             | 117 (17)       | 72 (15)              | 45 (19)           | 0.15    |
| Obesity                   | 182 (26)       | 137 (29)             | 45 (19)           | 0.005   |
| Cancer                    | 104 (15)       | 52 (11)              | 52 (22)           | <0.001  |
| Chronic pulmonary disease | 70 (10)        | 50 (11)              | 20 (9)            | 0.40    |
| Charlson score            | 1 (0, 4)       | 1 (0, 3)             | 2 (1, 5)          | <0.001  |
| Polypharmacy              |                |                      |                   | 0.18    |
| ≤4                        | 469 (66)       | 317 (67)             | 152 (66)          |         |
| 5-9                       | 197 (28)       | 126 (27)             | 71 (31)           |         |
| ≥10                       | 41 (6)         | 32 (7)               | 9 (4)             |         |

|                              |                  |                  |                    |        |
|------------------------------|------------------|------------------|--------------------|--------|
| Previously independent       | 517 (73)         | 378 (80)         | 139 (59)           | <0.001 |
| Number of typical symptoms   | 3 (2, 4)         | 3 (3, 5)         | 3 (2, 4)           | <0.001 |
| Days of symptoms             | 7 (5, 11)        | 8 (5, 11)        | 7 (5, 10)          | 0.006  |
| Supplemental oxygen          | 513 (73)         | 334 (70)         | 179 (77)           | 0.056  |
| Temperature <36°C ou >37.6°C | 203 (29%)        | 140 (29)         | 63 (27)            | 0.52   |
| MAP <70 mmHg                 | 39 (6)           | 19 (4)           | 20 (9)             | 0.012  |
| Lymphocytes (cels/mm3)       | 900 (610, 1330)  | 977 (650, 1374)  | 835 (600, 1200)    | 0.004  |
| C-reactive protein           | 132 (72, 226)    | 127 (68, 218)    | 149 (83, 239)      | 0.067  |
| GFR (mL/min)                 | 70 (32, 98)      | 75 (38, 104)     | 56 (27, 90)        | <0.001 |
| D-dimer (ng/mL)              | 1748 (838, 7244) | 1485 (719, 5633) | 3143 (1142, 13728) | <0.001 |
| Albumin (g/dL)               | 3.1 (2.8, 3.4)   | 3.2 (2.9, 3.4)   | 2.9 (2.6, 3.2)     | <0.001 |
| Total days in ICU            | 2 (0, 10)        | 0 (0, 8)         | 5 (0, 12)          | <0.001 |
| Ventilator utilization       | 289 (41)         | 167 (35)         | 122 (53)           | 0.038  |
| Length of stay (days):       | 11 (6, 16)       | 10 (6, 15)       | 13 (8, 20)         | <0.001 |
| Outcome                      |                  |                  |                    | <0.001 |
| Discharge                    | 434 (61)         | 329 (70)         | 105 (45)           |        |
| In-hospital death            | 273 (39)         | 144 (30)         | 129 (55)           |        |

Data are presented as mean [ $\pm$ SD] or median (IQR) for continuous measures, and n (%) for categorical measures.

6  
7  
8  
9  
10  
11  
12  
13  
14  
15  
16  
17  
18  
19  
20  
21  
22  
23  
24  
25  
26  
27  
28  
29  
30  
31  
32  
33  
34  
35  
36  
37  
38
